# Supplementary material
Source: PubMed Central journal article supplement (PMC4789898)
Supplement: harz000647.wt1_default.pdf [file harz000647.wt1_default.pdf]

## Risk of bias for each eligible trial

|                   | Random sequence generation (selection bias) | Allocation concealment (selection bias) | Blinding of participants and personnel (performance bias) | Blinding of outcome assessment (detection bias) | Incomplete outcome data (attrition bias) | Selective reporting (reporting bias) | Other bias |
|-------------------|---------------------------------------------|-----------------------------------------|-----------------------------------------------------------|-------------------------------------------------|------------------------------------------|--------------------------------------|------------|
| ALLAY 2009        | +                                           | +                                       | +                                                         | +                                               | +                                        | +                                    | ?          |
| ALOFT 2008        | +                                           | +                                       | +                                                         | +                                               | +                                        | +                                    | +          |
| ASPIRE 2011       | +                                           | +                                       | +                                                         | +                                               | +                                        | +                                    | ?          |
| AVANTE GARDE 2010 | ?                                           | ?                                       | +                                                         | +                                               | +                                        | +                                    | ?          |
| AVOID 2008        | +                                           | ?                                       | ?                                                         | +                                               | +                                        | +                                    | ?          |
| Oparil 2007       | +                                           | ?                                       | +                                                         | +                                               | +                                        | +                                    | +          |
| Persson 2009      | ?                                           | +                                       | ?                                                         | ?                                               | +                                        | +                                    | ?          |
| Pool 2007         | +                                           | +                                       | ?                                                         | ?                                               | +                                        | +                                    | ?          |
| Uresin 2007       | +                                           | +                                       | ?                                                         | ?                                               | +                                        | +                                    | ?          |
| VANTAGE 2009      | ?                                           | ?                                       | +                                                         | ?                                               | +                                        | +                                    | ?          |
