# Supplementary material
Source: PubMed Central journal article supplement (PMC4789898)
Supplement: harz000647.ww1_default.pdf [file harz000647.ww1_default.pdf]

**eMethods:** Search Strategy for MEDLINE, EMBASE and CENTRAL

Database: Ovid MEDLINE(R) <1948 to May Week 1 2011>

1. (Aliskiren or "cgp 60536" or "cgp 60536b" or cgp60536 or cgp60536b or rasilez or "spp 100" or "spp 100b" or spp100 or spp100b or tekturna).mp. (478)
2. randomized controlled trial.pt. or randomized controlled trials as topic/ or clinical trials as topic/ or clinical trial, phase i.pt. or clinical trials, phase i as topic/ or clinical trial, phase ii.pt. or clinical trials, phase ii as topic/ or clinical trial, phase iii.pt. or clinical trials, phase iii as topic/ or clinical trial, phase iv.pt. or clinical trials, phase iv as topic/ or controlled clinical trial.pt. or controlled clinical trials as topic/ or meta analysis.pt. or meta analysis as topic/ or multicenter study.pt. or multicenter studies as topic/ or randomized controlled trials/ or random allocation/ or double-blind method/ or single-blind method/ or (random\* or (doubl\* adj2 dummy) or ((Singl\* or doubl\* or trebl\* or tripl\*) adj5 (blind\* or mask\*)) or RCT or RCTs or (control\* adj5 trial\*) or multicent\* or placebo\* or metaanalys\* or (meta adj5 analys\*) or sham or effectiveness or efficacy or compar\*).ti,ab. or case-control studies/ or exp cohort studies/ or cohort\*.mp. or registries/ (4347429)
3. exp Angiotensin-Converting Enzyme Inhibitors/ or (ace adj2 inhibitor\*).mp. or "kininase ii inhibitor\*".mp. or (sarile or "sq14,534" or "sq-14534" or "sq-14,534" or lopirin or captopril or "sq14,225" or "sq-14,225" or "sq 14,534" or "sq 14225" or "sq 14534" or "sq 14,225" or capoten or sq14534 or "sq-14225" or sq14225 or cilazapril or "ro-31-2848" or inhibace or ro312848 or "ro 31-2848" or "ro 312848" or "ro 31 2848" or "mk-421" or mk421 or enalapril or renitec or renitek or "mk 421" or enalaprilat or "mk 422" or "pres iv" or mk422 or "mk-422" or vasotec or xanef or fosinopril or "sq-28,555" or "sq-28555" or sq23555 or fosinorm or fositens or fosinopril or newace or "sq28,555" or tensocardil or "sq 28555" or staril or hiperlex or fozitec or monopril or dynacil or "tenso stop" or fosinil or lysinopril or zestril or "mk-521" or mk521 or prinivil or lisinopril or perindopril or "s 9490" or s9490 or "s 94903" or perstartium or pirindopril or "s 9490 3" or "s-9490" or "s 9490-3" or ramipril or altace or zabien or "hoe 498" or vesdil or acovil or carasel or hoe498 or "hoe-498" or triatec or tritace or ramace or delix or saralasin or "p-113" or p113 or teprotide or "bpp-9a" or bpp9a or "sq-20881" or sq20881 or sarile or sarcosine or losartan or "mk-954" or mk954 or "mk 954" or "dup 753" or dup753 or cozaar or saralasin).mp. or receptors, angiotensin/ or receptor, angiotensin, type 1/ or receptor, angiotensin, type 2/ or angiotensin receptor antagonists/ or l-sarcosine-8-isoleucine angiotensin ii/ or losartan/ or saralasin/ or angiotensin ii type 2 receptor blockers/ or angiotensins/ or angiotensin ii/ (78688)
4. 1 and 3 (195)
5. 2 and 4 (126)

Database: Embase <1980 to 2011 Week 18>

Search Strategy:

1. Aliskiren/ or Aliskiren plus hydrochlorothiazide/ (1275)
2. exp angiotensin receptor antagonist/ (44132)
3. exp Aliskiren plus valsartan/ (3)
4. Aliskiren/ or Aliskiren plus hydrochlorothiazide/ or Aliskiren plus valsartan/ or (Aliskiren or "cgp 60536" or "cgp 60536b" or cgp60536 or cgp60536b or rasilez or "spp 100" or "spp 100b" or spp100 or spp100b or tekturna).mp. (1348)
5. exp dipeptidyl carboxypeptidase inhibitor/ or (ace adj2 inhibitor\*).mp. or "kininase ii inhibitor\*".mp. or (sarile or "sq14,534" or "sq-14534" or "sq-14,534" or lopirin or captopril or "sq14,225" or "sq-14,225" or "sq 14,534" or "sq 14225" or "sq 14534" or "sq 14,225" or capoten or sq14534 or "sq-14225" or sq14225 or cilazapril or "ro-31-2848" or inhibace or ro312848 or "ro 31-2848" or "ro 312848" or "ro 31 2848" or "mk-421" or mk421 or enalapril or renitec or renitek or "mk 421" or enalaprilat or "mk 422" or "pres iv" or mk422 or "mk-422" or vasotec or xanef or fosinopril or "sq-28,555" or "sq-28555" or sq23555 or fosinorm or fositens or fosinopril or newace or "sq28,555" or tensocardil or "sq 28555" or staril or hiperlex or fozitec or monopril or dynacil or "tenso stop" or fosinil or lysinopril or zestril or "mk-521" or mk521 or prinivil or lisinopril or perindopril or "s 9490" or s9490 or "s 94903" or perstartium or pirindopril or "s 9490 3" or "s-9490" or "s 9490-3" or ramipril or altace or zabien or "hoe 498" or vesdil or acovil or carasel or hoe498 or "hoe-498" or triatec or tritace or ramace or delix or saralasin or "p-113" or p113 or teprotide or "bpp-9a" or bpp9a or "sq-20881" or sq20881 or sarile or sarcosine or losartan or "mk-954" or mk954 or "mk 954" or "dup 753" or dup753 or cozaar or saralasin).mp. or exp angiotensin receptor antagonist/ or angiotensin derivative/ or angiotensin/ or angiotensin ii/ or "angiotensin ii [1 sarcosine 8 alanine]"/ or "angiotensin ii

- [1 sarcosine 8 isoleucine]"/ or "angiotensin ii [1 sarcosine 8 threonine]"/ or "angiotensin ii [1 sarcosine]"/ or "angiotensin ii [1-7]amide[1 sarcosine]"/ or "angiotensin ii [3-8]"/ or "angiotensin ii [5 isoleucine]"/ or "angiotensin ii [5 valine]"/ or angiotensin ii derivative/ (166480)
6. 20 and 21 (976)
  7. ct.fs. (402088)
  8. controlled clinical trial/ (172932)
  9. randomized controlled trial/ (286803)
  10. multicenter study/ (83819)
  11. meta analysis/ (54428)
  12. (random\* or (doubl\* adj2 dummy) or ((Singl\* or doubl\* or trebl\* or tripl\*) adj5 (blind\* or mask\*)) or RCT or RCTs or (control\* adj5 trial\*) or multicent\* or placebo\* or metaanalys\* or (meta adj5 analys\*) or sham or effectiveness or efficacy or compar\*).ti,ab. (4009734)
  13. 25 or 31 or 32 or 33 or 34 or 35 (4250196)
  14. 24 and 37 (692)
  15. 23 or 38 (692)
  16. limit 38 to human (589)
  17. (human or humans or patient\* or subject\*).mp. (13604920)
  18. 38 and 41 (672)
  19. 40 or 42 (672)

Database: EBM Reviews - Cochrane Central Register of Controlled Trials <2nd Quarter 2011>

Search Strategy:

- 
1. Aliskiren/ or Aliskiren plus hydrochlorothiazide/ or Aliskiren plus valsartan/ or (Aliskiren or "cgp 60536" or "cgp 60536b" or cgp60536 or cgp60536b or rasilez or "spp 100" or "spp 100b" or spp100 or spp100b or tekturna).mp. (78)
  2. exp dipeptidyl carboxypeptidase inhibitor/ or (ace adj2 inhibitor\*).mp. or "kininase ii inhibitor\*".mp. or (sarile or "sq14,534" or "sq-14534" or "sq-14,534" or lopirin or captopril or "sq14,225" or "sq-14,225" or "sq 14,534" or "sq 14225" or "sq 14534" or "sq 14,225" or capoten or sq14534 or "sq-14225" or sq14225 or cilazapril or "ro-31-2848" or inhibace or ro312848 or "ro 31-2848" or "ro 312848" or "ro 31 2848" or "mk-421" or mk421 or enalapril or renitec or renitec or "mk 421" or enalaprilat or "mk 422" or "pres iv" or mk422 or "mk-422" or vasotec or xanef or fosinopril or "sq-28,555" or "sq-28555" or sq23555 or fosinorm or fositens or fosenopril or newace or "sq28,555" or tensocardil or "sq 28555" or staril or hiperlex or fozitec or monopril or dynacil or "tenso stop" or fosinil or lysinopril or zestril or "mk-521" or mk521 or prinivil or lisinopril or perindopril or "s 9490" or s9490 or "s 94903" or perstarium or pirindopril or "s 9490 3" or "s-9490" or "s 9490-3" or ramipril or altace or zabien or "hoe 498" or vesdil or acovil or carasel or hoe498 or "hoe-498" or triatec or tritace or ramace or delix or saralasin or "p-113" or p113 or teprotide or "bpp-9a" or bpp9a or "sq-20881" or sq20881 or sarile or sarcosine or losartan or "mk-954" or mk954 or "mk 954" or "dup 753" or dup753 or cozaar or saralasin).mp. or exp angiotensin receptor antagonist/ or angiotensin derivative/ or angiotensin/ or angiotensin ii/ or "angiotensin ii [1 sarcosine 8 alanine]"/ or "angiotensin ii [1 sarcosine 8 isoleucine]"/ or "angiotensin ii [1 sarcosine 8 threonine]"/ or "angiotensin ii [1 sarcosine]"/ or "angiotensin ii [1-7]amide[1 sarcosine]"/ or "angiotensin ii [3-8]"/ or "angiotensin ii [5 isoleucine]"/ or "angiotensin ii [5 valine]"/ or angiotensin ii derivative/ (8292)
  - 3 exp Angiotensin-Converting Enzyme Inhibitors/ or (ace adj2 inhibitor\*).mp. or "kininase ii inhibitor\*".mp. or (sarile or "sq14,534" or "sq-14534" or "sq-14,534" or lopirin or captopril or "sq14,225" or "sq-14,225" or "sq 14,534" or "sq 14225" or "sq 14534" or "sq 14,225" or capoten or sq14534 or "sq-14225" or sq14225 or cilazapril or "ro-31-2848" or inhibace or ro312848 or "ro 31-2848" or "ro 312848" or "ro 31 2848" or "mk-421" or mk421 or enalapril or renitec or renitec or "mk 421" or enalaprilat or "mk 422" or "pres iv" or mk422 or "mk-422" or vasotec or xanef or fosinopril or "sq-28,555" or "sq-28555" or sq23555 or fosinorm or fositens or fosenopril or newace or "sq28,555" or tensocardil or "sq 28555" or staril or hiperlex or fozitec or monopril or dynacil or "tenso stop" or fosinil or lysinopril or zestril or "mk-521" or mk521 or prinivil or lisinopril or perindopril or "s 9490" or s9490 or "s 94903" or perstarium or pirindopril or "s 9490 3" or "s-9490" or "s 9490-3" or ramipril or altace or zabien or "hoe 498" or vesdil or acovil or carasel or hoe498 or "hoe-498" or triatec or tritace or ramace or delix or saralasin or "p-113" or p113 or teprotide or "bpp-9a" or bpp9a or "sq-20881" or sq20881 or sarile or sarcosine or losartan or "mk-954" or mk954 or "mk 954" or "dup 753" or dup753 or cozaar or saralasin).mp. or receptors, angiotensin/ or

receptor, angiotensin, type 1/ or receptor, angiotensin, type 2/ or angiotensin receptor antagonists/ or 1-sarcosine-8-isoleucine angiotensin ii/ or losartan/ or saralasin/ or angiotensin ii type 2 receptor blockers/ or angiotensins/ or angiotensin ii/ (9019)

4. 2 or 3 (9019)

5. 1 and 4 (28)

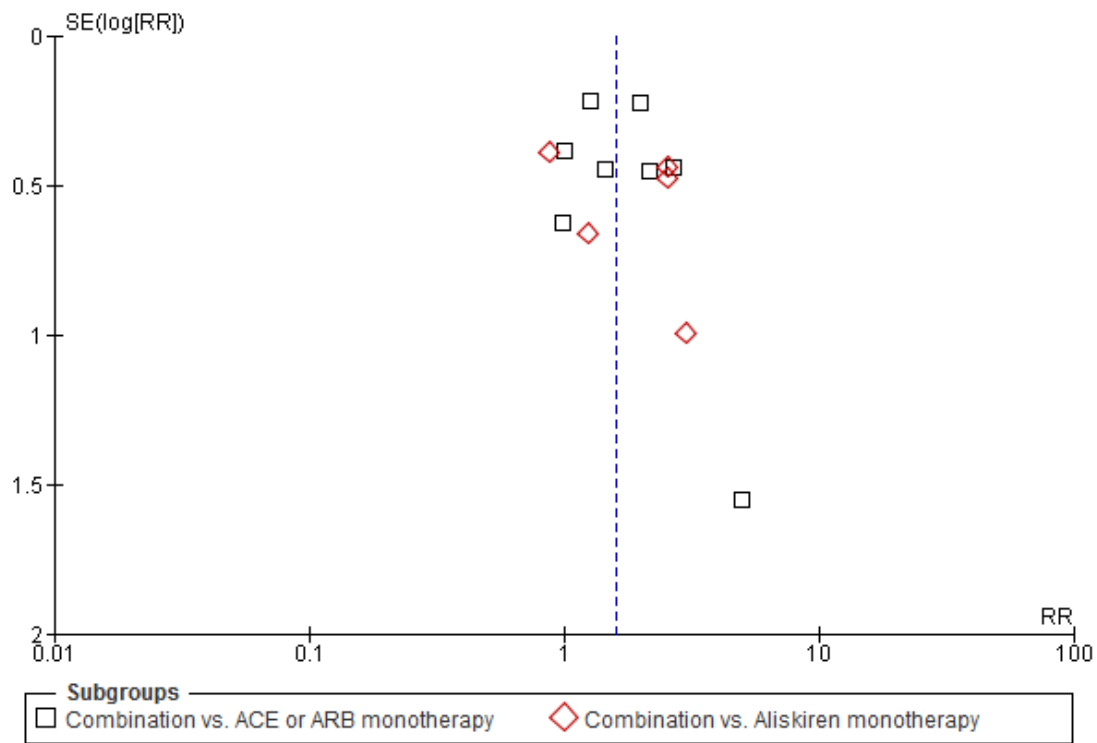

**eFigure1:** Forest plot for hyperkalemia outcome among subjects given combination therapy versus monotherapy with ACEi or ARB or Aliskiren.
